# Supplementary material for: Thermoplastic Polymers with Nanosilver Addition—Microstructural, Surface and Mechanical Evaluation during a 36-Month Deionized Water Incubation Period
Source: MDPI journal article supplement (doi:10.3390/ma14020361), 2021-01-13
Supplement: s1 [file s1]

# Thermoplastic Polymers with Nanosilver Addition— Microstructural, Surface and Mechanical Evaluation during a 36-Month Deionized Water Incubation Period

Magdalena Ziabka <sup>1,\*</sup> and Michał Dziadek <sup>2</sup>

<sup>1</sup> Department of Ceramics and Refractories, Faculty of Materials Science and Ceramics, AGH University of Science and Technology, 30-059 Krakow, Poland

<sup>2</sup> Department of Glass Technology and Amorphous Coatings, Faculty of Materials Science and Ceramics, AGH University of Science and Technology, 30-059 Krakow, Poland; dziadek@agh.edu.pl

\* Correspondence: ziabka@agh.edu.pl; Tel.: +48-012-617-2523

**Citation:** Ziabka, M.; Dziadek, M. Thermoplastic Polymers with Nanosilver Addition—Microstructural, Surface and Mechanical Evaluation during a 36-Month Deionized Water Incubation Period. *Materials* **2021**, *14*, 361. <https://doi.org/10.3390/ma14020361>

Received: 3 December 2020

Accepted: 11 January 2021

Published: date

**Publisher's Note:** MDPI stays neutral with regard to jurisdictional claims in published maps and institutional affiliations.

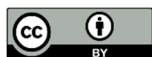

**Copyright:** © 2021 by the authors. Submitted for possible open access publication under the terms and conditions of the Creative Commons Attribution (CC BY) license (<http://creativecommons.org/licenses/by/4.0/>).

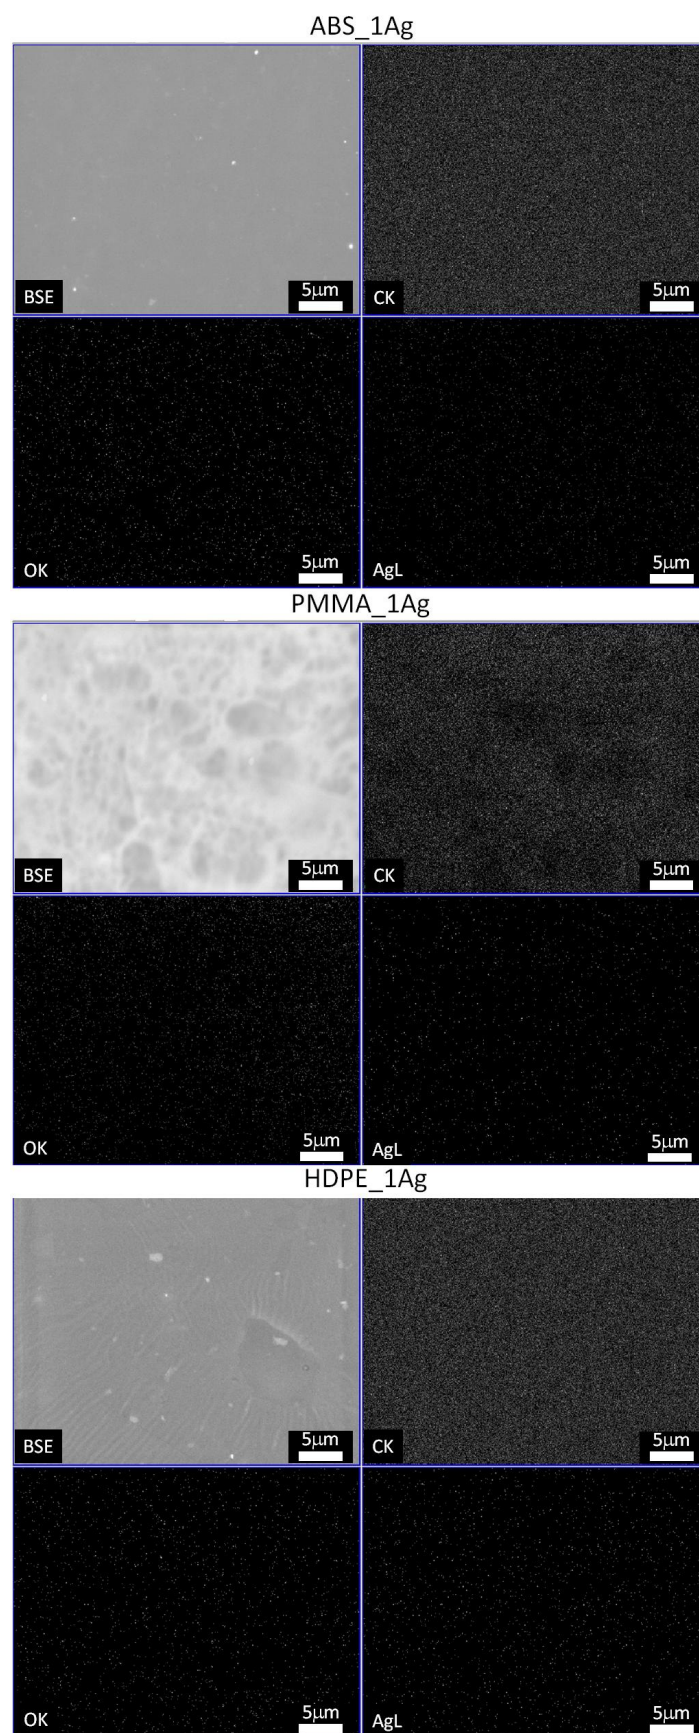

**Figure S1.** Mapping analysis of ABS\*, PMMA and HDPE containing 1 wt.% of silver nanoparticles (AgNPs). \*ABS mapping do not show N distribution.
